# Supplementary material for: Widespread splicing changes in human brain development and aging
Source: PubMed Central journal article supplement — Mol Syst Biol. 2013 Jan 22;9:633. doi: 10.1038/msb.2012.67 (PMC3564255; doi:10.1038/msb.2012.67), 2013-01-22
Supplement: msb201267-s1.pdf [file msb201267-s1.pdf]

# Supplementary Information

## Table of Content

|                                                                                                                                                    |    |
|----------------------------------------------------------------------------------------------------------------------------------------------------|----|
| Table S1. Sample information in DS1.....                                                                                                           | 3  |
| Table S2. Sample information in DS2.....                                                                                                           | 4  |
| Table S3. Numbers of sequence reads.....                                                                                                           | 5  |
| Table S4. Mismatch counts in the mapped reads.....                                                                                                 | 6  |
| Table S5. Overlap of segments showing age-related splicing changes in DS1 and DS2.....                                                             | 7  |
| Table S6. PCR validation of age-related splicing changes. ....                                                                                     | 8  |
| Table S7. Rhesus macaque sample and sequence read coverage information. ....                                                                       | 10 |
| Table S8. Functional characteristics of genes in different splicing patterns.....                                                                  | 11 |
| Table S9. List of correlated splicing factors.....                                                                                                 | 12 |
| Table S10. Enrichment of genes with cell-type specific expression in splicing patterns (top) or brain region-specific genes (bottom). ....         | 13 |
| Table S11. Splicing factor binding motifs.....                                                                                                     | 14 |
| Table S12. PCR primers. ....                                                                                                                       | 15 |
| Figure S1. The distribution and frequency of mismatches along reads.....                                                                           | 16 |
| Figure S2. Effect of allowing mismatches during read mapping on inclusion ratio changes with age. ....                                             | 17 |
| Figure S3. Effect of allowing mismatches during read mapping on changes in intron retention with age. ....                                         | 18 |
| Figure S4. Retention of the 7th intron of the <i>AKR1B1</i> gene. ....                                                                             | 19 |
| Figure S5. The distribution of read overhangs lengths spanning splice junctions. ....                                                              | 20 |
| Figure S6. Correlation between age-related inclusion ratio changes measured by Affymetrix Exon Arrays and RNA-seq. ....                            | 21 |
| Figure S7. Inclusion ratio change index distribution for gene segments showing significant inclusion ratio change in development and/or aging..... | 22 |
| Figure S8. Scatter plot of splicing change index distribution containing splicing type information. ....                                           | 23 |
| Figure S9. For major age-related splicing change patterns in the human and macaque PFC.....                                                        | 24 |
| Figure S10. Relationship between gene expression and segment inclusion ratio.....                                                                  | 26 |

|                                                                                                                                                    |    |
|----------------------------------------------------------------------------------------------------------------------------------------------------|----|
| Figure S11. Hierarchical clustering of inclusion ratio values reveals distinct splicing patterns. ....                                             | 27 |
| Figure S12. Correlation of differences in age-related splicing changes between PFC and CBC measured using RNA-seq and Affymetrix Exon Arrays. .... | 28 |
| Figure S13. Alternative splicing of <i>APP</i> exon 9.....                                                                                         | 29 |
| Figure S14. Alternative splicing of the 6th exon of the <i>BIN1</i> gene. ....                                                                     | 30 |
| Figure S15. Multi-dimensional scaling (MDS) analysis of splicing divergence. ....                                                                  | 31 |
| Figure S16. Age-related splicing changes in African-Americans and Caucasians.....                                                                  | 32 |
| Figure S17. Gene coverage bias. ....                                                                                                               | 33 |

## Supplementary tables

**Table S1. Sample information in DS1.**

| Sample ID | Brain Bank ID | Age   |      | Sex | PMI <sup>1</sup> | RIN <sup>2</sup> |     | Source             | Ethnicity        | Cause of death                                |
|-----------|---------------|-------|------|-----|------------------|------------------|-----|--------------------|------------------|-----------------------------------------------|
|           |               | Years | Days |     |                  | PFC              | CBC |                    |                  |                                               |
| Pool 1    | Maryl_447     | 0     | 2    | m   | 3                | 8                | 7.2 | NICHD <sup>3</sup> | Caucasian        | Complications of birth                        |
|           | Maryl_779     | 0     | 5    | m   | 5                | 8.8              | 7.8 | NICHD              | African American | Congenital heart defect                       |
|           | Maryl_398     | 0     | 16   | f   | 3                | 9.1              | 8.3 | NICHD              | African American | Complications of birth                        |
|           | Maryl_1157    | 0     | 20   | f   | 14               | 7.1              | 7.5 | NICHD              | Caucasian        | Pneumonia associated with meconium aspiration |
|           | Maryl_759     | 0     | 35   | m   | 7                | 7.9              | 6.9 | NICHD              | Caucasian        | Idiopathic pulmonary hemorrhage               |
| Pool 2    | Maryl_1325    | 0     | 182  | f   | 1                | 8.4              | 8.1 | NICHD              | African American | Sudden infant death syndrome                  |
|           | Maryl_131     | 0     | 198  | f   | 24               | 7.8              | 7.9 | NICHD              | Caucasian        | Sudden infant death syndrome                  |
|           | Maryl_1281    | 0     | 206  | m   | 6                | 8.4              | 7.2 | NICHD              | African American | Sudden infant death syndrome                  |
|           | Maryl_121     | 0     | 224  | m   | 20               | 6.7              | 6.8 | NICHD              | Caucasian        | Sudden infant death syndrome                  |
|           | Maryl_435     | 0     | 274  | m   | 10               | 7.5              | 6.2 | NICHD              | Caucasian        | Meningitis                                    |
| Pool 3    | 4669          | 16    | 125  | m   | 16               | 8.3              | 8.2 | NICHD              | Caucasian        | Neck and head injuries                        |
|           | 4848          | 16    | 271  | m   | 15               | 9.1              | 7.6 | NICHD              | Caucasian        | Accident, drowning                            |
|           | 1409          | 18    | 38   | m   | 6                | 7.2              | 6.8 | NICHD              | Caucasian        | Accident, multiple injures                    |
|           | 1011          | 19    | 69   | f   | 7                | 6.5              | 7   | NICHD              | Caucasian        | Accident, multiple injures                    |
|           | 933           | 20    | 255  | m   | 12               | 8.7              | 8.9 | NICHD              | Caucasian        | Accident, lightning strike                    |
| Pool 4    | 1455          | 25    | 149  | f   | 7                | 7.4              | 8.1 | NICHD              | Caucasian        | Multiple injures                              |
|           | 605           | 25    | 152  | m   | 19               | 9.2              | 8.9 | NICHD              | African American | Asthma                                        |
|           | 602           | 27    | 42   | m   | 15               | 8.8              | 8.9 | NICHD              | African American | Asthma                                        |
|           | 1026          | 28    | 131  | m   | 6                | 8.1              | 7.5 | NICHD              | Caucasian        | Congenital heart disease                      |
|           | 1365          | 28    | 239  | m   | 17               | 8.2              | 7.4 | NICHD              | Caucasian        | Accident, multiple injures                    |
| Pool 5    | S96/206       | 70    | 0    | f   | 11               | 8                | 7.6 | NBB <sup>4</sup>   | Caucasian        | Metastasised mamma carcinoma                  |
|           | 4735          | 73    | 184  | m   | 21               | 7.5              | 6   | NICHD              | Caucasian        | Chronic obstructive pulmonary disease         |
|           | S01/322       | 73    | 0    | f   | 14               | 7.6              | 6.4 | NBB                | Caucasian        | Respiratory insufficiency                     |
|           | S00/059       | 78    | 0    | f   | 7                | 8.3              | 7.9 | NBB                | Caucasian        | Dec.cordis                                    |
|           | S04/057       | 80    | 0    | m   | 7                | 8.6              | 7   | NBB                | Caucasian        | Ventricular fibrillation                      |
| Pool 6    | S01/118       | 88    | 0    | m   | 7                | 7.7              | 7.3 | NBB                | Caucasian        | Euthanasia                                    |
|           | S96/297       | 90    | 0    | f   | 6                | 7.8              | 7.6 | NBB                | Caucasian        | Cardiac arrest                                |
|           | S03/084       | 96    | 0    | m   | 6                | 7.3              | 7.1 | NBB                | Caucasian        | Heart failure                                 |
|           | S03/119       | 97    | 0    | f   | 5                | 8.4              | 8   | NBB                | Caucasian        | Asthma cardialis                              |
|           | S00/047       | 98    | 0    | m   | 9                | 7.3              | 7.5 | NBB                | Caucasian        | Bleeding from aorta fissure                   |

<sup>1</sup>PMI: Postmortem intervals in hours.

<sup>2</sup>RIN: RNA integrity values measured by Agilent Bioanalyzer.

<sup>3</sup>NICHD: Brain and Tissue Bank for Developmental Disorders at the University of Maryland, USA.

<sup>4</sup>NBB: Netherlands Brain Bank, Amsterdam, Netherlands.

Samples used in both DS1 and DS2 are highlighted in gray.

**Table S2. Sample information in DS2.**

| Brain Bank ID | Age   |      | Sex | PMI <sup>1</sup> | RIN <sup>2</sup> | Source             | Ethnicity        | Cause of death                                |
|---------------|-------|------|-----|------------------|------------------|--------------------|------------------|-----------------------------------------------|
|               | Years | Days |     |                  |                  |                    |                  |                                               |
| Maryl_779     | 0     | 5    | m   | 5                | 8.8              | NICHD <sup>3</sup> | African American | Congenital heart defect                       |
| Maryl_1157    | 0     | 20   | f   | 14               | 7.1              | NICHD              | Caucasian        | Pneumonia associated with meconium aspiration |
| Maryl_759     | 0     | 35   | m   | 7                | 7.9              | NICHD              | Caucasian        | Idiopathic pulmonary hemorrhage               |
| Maryl_1055    | 0     | 94   | m   | 12               | 7.7              | NICHD              | Caucasian        | Bronchopneumonia                              |
| Maryl_1281    | 0     | 204  | m   | 6                | 8.4              | NICHD              | African American | Sudden infant death syndrome                  |
| 1453          | 1     | 78   | m   | 19               | 7.6              | NICHD              | African American | Asthma                                        |
| 1275          | 2     | 57   | f   | 21               | 7.5              | NICHD              | African American | Acute myocarditis                             |
| 1908          | 13    | 360  | m   | 13               | 8.3              | NICHD              | Caucasian        | Hanging                                       |
| 605           | 25    | 152  | m   | 19               | 9.2              | NICHD              | African American | Asthma                                        |
| 1496          | 53    | 112  | m   | 17               | 8.3              | NICHD              | Caucasian        | Arteriosclerotic cardiovascular disease       |
| S06/117       | 66    | 0    | m   | 10               | 8.6              | NBB <sup>4</sup>   | Caucasian        | Ruptured abdominal aneurysm aorta             |
| S01/118       | 88    | 0    | m   | 7                | 7.7              | NBB                | Caucasian        | Euthanasia                                    |
| S00/047       | 98    | 0    | m   | 9                | 7.3              | NBB                | Caucasian        | Bleeding from aorta fissure                   |

<sup>1</sup>*PMI*: Postmortem intervals in hours.

<sup>2</sup>*RIN*: RNA integrity values measured by Agilent Bioanalyzer.

<sup>3</sup>*NICHD*: Brain and Tissue Bank for Developmental Disorders at the University of Maryland, USA.

<sup>4</sup>*NBB*: Netherlands Brain Bank, Amsterdam, Netherlands.

Samples used in both DS1 and DS2 are highlighted in gray.

**Table S3. Numbers of sequence reads.**

| Dataset | Sample ID / Brain Bank ID | Brain Region | Total read pairs (DS2 – reads) | Mapped read pairs (DS2 – reads) | Location of mapped reads |           |          |
|---------|---------------------------|--------------|--------------------------------|---------------------------------|--------------------------|-----------|----------|
|         |                           |              |                                |                                 | gene                     | exon      | junction |
| 1       | Pool 1                    | PFC          | 12986849                       | 8394381                         | 7732954                  | 6309623   | 1571150  |
|         | Pool 1                    | CBC          | 14401087                       | 9183265                         | 8449786                  | 6487468   | 1827020  |
|         | Pool 2                    | PFC          | 18606331                       | 10064574                        | 9255556                  | 7650490   | 1713418  |
|         | Pool 2                    | CBC          | 17173882                       | 9962309                         | 9123172                  | 6740399   | 1769939  |
|         | Pool 3                    | PFC          | 10867452                       | 7114384                         | 6665929                  | 5882014   | 1717835  |
|         | Pool 3                    | CBC          | 11454526                       | 7401286                         | 6851346                  | 5359984   | 1662481  |
|         | Pool 4                    | PFC          | 17660808                       | 10543725                        | 9912871                  | 8528704   | 2786008  |
|         | Pool 4                    | CBC          | 16720362                       | 10467977                        | 9669924                  | 7396281   | 2316290  |
|         | Pool 5                    | PFC          | 17715490                       | 9821954                         | 9162963                  | 7645879   | 1895665  |
|         | Pool 5                    | CBC          | 17130871                       | 10443253                        | 9547717                  | 7116620   | 1941140  |
|         | Pool 6                    | PFC          | 14164681                       | 8710121                         | 8159383                  | 7019562   | 1977553  |
|         | Pool 6                    | CBC          | 12673390                       | 7691734                         | 7071345                  | 5452222   | 1507773  |
| 2       | Maryl_779                 | PFC          | 21284713                       | 14379727                        | 13204850                 | 10882306  | 3570100  |
|         | Maryl_1157                | PFC          | 20754409                       | 11843993                        | 10746223                 | 8779519   | 2331123  |
|         | Maryl_759                 | PFC          | 23722421                       | 16285468                        | 15044787                 | 12824078  | 4379569  |
|         | Maryl_1055                | PFC          | 23416250                       | 15119297                        | 13889701                 | 11883054  | 3065203  |
|         | Maryl_1281                | PFC          | 22698303                       | 14764891                        | 13592458                 | 11845774  | 3340220  |
|         | 1453                      | PFC          | 23934412                       | 16143315                        | 14975097                 | 13250399  | 4420759  |
|         | 1275                      | PFC          | 17759057                       | 11401664                        | 10508629                 | 9195223   | 2870504  |
|         | 1908                      | PFC          | 19901399                       | 12479373                        | 11676044                 | 10643369  | 3348264  |
|         | 605                       | PFC          | 23201284                       | 15203403                        | 14242124                 | 12877188  | 4312333  |
|         | 1496                      | PFC          | 16019209                       | 10396263                        | 9721112                  | 8784880   | 2732116  |
|         | S06/117                   | PFC          | 20948595                       | 14199806                        | 13281513                 | 11742463  | 3947097  |
|         | S01/118                   | PFC          | 21032459                       | 14104142                        | 13108149                 | 11366346  | 3502188  |
| S00/047 | PFC                       | 20255260     | 13994072                       | 13069914                        | 11391485                 | 3564658   |          |
| Total   |                           |              | 477761149                      | 180315414                       | 167060601                | 145466084 | 45384134 |

**Table S4. Mismatch counts in the mapped reads.**

| Dataset | ID         | Brain region | Mismatch count |      |      |      |
|---------|------------|--------------|----------------|------|------|------|
|         |            |              | 0              | 1    | 2    | 3    |
| 1       | Pool 1     | PFC          | 0.64           | 0.25 | 0.07 | 0.03 |
|         | Pool 1     | CBC          | 0.6            | 0.27 | 0.09 | 0.03 |
|         | Pool 2     | PFC          | 0.57           | 0.28 | 0.1  | 0.05 |
|         | Pool 2     | CBC          | 0.53           | 0.29 | 0.12 | 0.05 |
|         | Pool 3     | PFC          | 0.64           | 0.25 | 0.08 | 0.03 |
|         | Pool 3     | CBC          | 0.61           | 0.25 | 0.1  | 0.05 |
|         | Pool 4     | PFC          | 0.6            | 0.25 | 0.1  | 0.05 |
|         | Pool 4     | CBC          | 0.59           | 0.26 | 0.1  | 0.05 |
|         | Pool 5     | PFC          | 0.64           | 0.25 | 0.08 | 0.03 |
|         | Pool 5     | CBC          | 0.57           | 0.28 | 0.1  | 0.04 |
|         | Pool 6     | PFC          | 0.54           | 0.28 | 0.12 | 0.06 |
|         | Pool 6     | CBC          | 0.51           | 0.3  | 0.13 | 0.06 |
| 2       | Maryl_779  | PFC          | 0.71           | 0.18 | 0.07 | 0.04 |
|         | Maryl_1157 | PFC          | 0.72           | 0.17 | 0.07 | 0.04 |
|         | Maryl_759  | PFC          | 0.67           | 0.21 | 0.07 | 0.04 |
|         | Maryl_1055 | PFC          | 0.73           | 0.17 | 0.06 | 0.04 |
|         | Maryl_1281 | PFC          | 0.70           | 0.18 | 0.07 | 0.04 |
|         | 1453       | PFC          | 0.69           | 0.21 | 0.06 | 0.03 |
|         | 1275       | PFC          | 0.72           | 0.19 | 0.06 | 0.03 |
|         | 1908       | PFC          | 0.72           | 0.19 | 0.06 | 0.03 |
|         | 605        | PFC          | 0.70           | 0.21 | 0.06 | 0.03 |
|         | 1496       | PFC          | 0.75           | 0.17 | 0.05 | 0.03 |
|         | S06/117    | PFC          | 0.76           | 0.16 | 0.05 | 0.03 |
|         | S01/118    | PFC          | 0.76           | 0.16 | 0.05 | 0.03 |
| S00/047 | PFC        | 0.77         | 0.16           | 0.05 | 0.03 |      |

**Table S5. Overlap of segments showing age-related splicing changes in DS1 and DS2.**

|          | <b>DS1</b> | <b>DS2</b> | <b>Shared</b> | <b><i>p</i>-value<sup>1</sup></b> |
|----------|------------|------------|---------------|-----------------------------------|
| Segments | 3,132      | 6,114      | 1,484         | $<1 \times 10^{-50}$              |
| Gene     | 1,456      | 2,588      | 721           | $<1 \times 10^{-20}$              |

<sup>1</sup>Excess of the significant age-related splicing changes overlapping between DS1 and DS2 was tested using Fisher's exact test. The significance analysis was based on 30,122 segments (from 6,758 genes) with sufficient sequence reads coverage in both datasets.

**Table S6. PCR validation of age-related splicing changes.**

|                        |                                                                                     |      |                                                                                     |                                                                                     |                                                                                     |                                                                                     |                                                                                      |      |                                                                                      |                                                                                       |                                                                                       |      |
|------------------------|-------------------------------------------------------------------------------------|------|-------------------------------------------------------------------------------------|-------------------------------------------------------------------------------------|-------------------------------------------------------------------------------------|-------------------------------------------------------------------------------------|--------------------------------------------------------------------------------------|------|--------------------------------------------------------------------------------------|---------------------------------------------------------------------------------------|---------------------------------------------------------------------------------------|------|
| <b>Seg</b>             | AGAP3                                                                               |      |                                                                                     | AKR1B1                                                                              |                                                                                     |                                                                                     | ASPH                                                                                 |      | CADPS                                                                                |                                                                                       | CDC42BPA                                                                              |      |
| <b>Pos<sup>1</sup></b> | 34157-37048                                                                         |      |                                                                                     | 11261-11987                                                                         |                                                                                     |                                                                                     | 181884-181928                                                                        |      | 83378-83510                                                                          |                                                                                       | 21014-21199                                                                           |      |
| <b>Age<sup>2</sup></b> | 1                                                                                   | 3    | 5                                                                                   | 1                                                                                   | 4                                                                                   | 5                                                                                   | 5                                                                                    | 3    | 1                                                                                    | 6                                                                                     | 6                                                                                     | 1    |
| <b>Seq<sup>3</sup></b> | .205                                                                                | .441 | .533                                                                                | .471                                                                                | .089                                                                                | .231                                                                                | .602                                                                                 | .907 | .261                                                                                 | .749                                                                                  | .581                                                                                  | 0    |
| <b>PCR<sup>4</sup></b> | .145                                                                                | .388 | .424                                                                                | .220                                                                                | .082                                                                                | .093                                                                                | .670                                                                                 | .905 | .254                                                                                 | .805                                                                                  | .345                                                                                  | .039 |
| <b>Gel<sup>5</sup></b> | 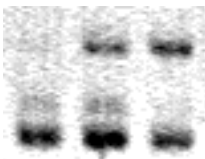   |      |                                                                                     |    |                                                                                     |                                                                                     |     |      |   |                                                                                       |    |      |
| <b>Seg</b>             | CTNNA2                                                                              |      | DBN1                                                                                |                                                                                     | DCLK1                                                                               |                                                                                     | EXD3                                                                                 |      |                                                                                      | FMNL2                                                                                 |                                                                                       |      |
| <b>Pos</b>             | 1433854-1433997                                                                     |      | 2996-3133                                                                           |                                                                                     | 19228-19301                                                                         |                                                                                     | 56722-66995                                                                          |      |                                                                                      | 305555-313054                                                                         |                                                                                       |      |
| <b>Age</b>             | 1                                                                                   | 6    | 1                                                                                   | 3                                                                                   | 1                                                                                   | 6                                                                                   | 1                                                                                    | 3    | 5                                                                                    | 1                                                                                     | 4                                                                                     | 6    |
| <b>Seq</b>             | .348                                                                                | .023 | .270                                                                                | .923                                                                                | .060                                                                                | .482                                                                                | .943                                                                                 | .399 | .151                                                                                 | .916                                                                                  | .257                                                                                  | .397 |
| <b>PCR</b>             | .394                                                                                | .146 | .190                                                                                | .808                                                                                | .175                                                                                | .707                                                                                | .261                                                                                 | .058 | .090                                                                                 | .813                                                                                  | .378                                                                                  | .294 |
| <b>Gel</b>             |   |      |   |                                                                                     |   |                                                                                     |   |      |                                                                                      |   |                                                                                       |      |
| <b>Seg</b>             | GRIN1                                                                               |      | LMO7                                                                                |                                                                                     | MAPRE3                                                                              |                                                                                     | MAPT                                                                                 |      |                                                                                      | MAPT                                                                                  |                                                                                       |      |
| <b>Pos</b>             | 9763-9825                                                                           |      | 234827-234935                                                                       |                                                                                     | 53642-53686                                                                         |                                                                                     | 77476-77535                                                                          |      |                                                                                      | 115927-116019                                                                         |                                                                                       |      |
| <b>Age</b>             | 4                                                                                   | 1    | 6                                                                                   | 1                                                                                   | 1                                                                                   | 4                                                                                   | 4                                                                                    | 1    | 2                                                                                    | 2                                                                                     | 4                                                                                     | 1    |
| <b>Seq</b>             | .267                                                                                | .043 | .641                                                                                | .012                                                                                | .296                                                                                | .802                                                                                | .429                                                                                 | .083 | .019                                                                                 | .327                                                                                  | .457                                                                                  | .056 |
| <b>PCR</b>             | .262                                                                                | .051 | .559                                                                                | .188                                                                                | .301                                                                                | .858                                                                                | .268                                                                                 | 0    | 0                                                                                    | .312                                                                                  | .518                                                                                  | .021 |
| <b>Gel</b>             |  |      |  |                                                                                     |  |                                                                                     |  |      |                                                                                      |  |                                                                                       |      |
| <b>Seg</b>             | MATR3                                                                               |      |                                                                                     | NDRG2                                                                               |                                                                                     | NEO1                                                                                |                                                                                      |      | NRCAM                                                                                |                                                                                       | PALM                                                                                  |      |
| <b>Pos</b>             | 51545-51688                                                                         |      |                                                                                     | 6102-6143                                                                           |                                                                                     | 240857-241015                                                                       |                                                                                      |      | 78008-78064                                                                          |                                                                                       | 31400-31531                                                                           |      |
| <b>Age</b>             | 4                                                                                   | 3    | 2                                                                                   | 2                                                                                   | 4                                                                                   | 3                                                                                   | 2                                                                                    | 5    | 3                                                                                    | 2                                                                                     | 1                                                                                     | 5    |
| <b>Seq</b>             | .177                                                                                | .286 | .460                                                                                | .311                                                                                | .513                                                                                | .434                                                                                | .380                                                                                 | .841 | .255                                                                                 | .792                                                                                  | .059                                                                                  | .397 |
| <b>PCR</b>             | .191                                                                                | .198 | .284                                                                                | .201                                                                                | .613                                                                                | .429                                                                                | .396                                                                                 | .661 | .245                                                                                 | .792                                                                                  | .012                                                                                  | .436 |
| <b>Gel</b>             |  |      |                                                                                     |  |                                                                                     |  |                                                                                      |      |  |                                                                                       |  |      |



| Seg | R3HDM1                                                                            |      |      | SGIP1                                                                             |      | UBP1 <sup>6</sup>                                                                 |      |      | WNK1                                                                                |      |
|-----|-----------------------------------------------------------------------------------|------|------|-----------------------------------------------------------------------------------|------|-----------------------------------------------------------------------------------|------|------|-------------------------------------------------------------------------------------|------|
| Pos | 73402-90154                                                                       |      |      | 148487-148911                                                                     |      | 47918-48809                                                                       |      |      | 126651-127109                                                                       |      |
| Age | 5                                                                                 | 4    | 1    | 1                                                                                 | 3    | 1                                                                                 | 4    | 6    | 5                                                                                   | 1    |
| Seq | 1                                                                                 | .930 | .455 | .036                                                                              | .765 | .542                                                                              | .177 | .063 | .176                                                                                | .771 |
| PCR | .740                                                                              | .895 | .298 | .046                                                                              | .785 | .340                                                                              | .099 | .102 | .023                                                                                | .673 |
| Gel |  |      |      |  |      |  |      |      |  |      |

<sup>1</sup>*Pos*: the relative position of the segment counted from the 5' end of the gene.

<sup>2</sup>*Age* 1 to 6 denote youngest to oldest samples (PFC from DS1) respectively.

<sup>3</sup>*Seq*: the inclusion ratio calculated by RNA-seq DS1.

<sup>4</sup>*PCR*: the inclusion ratio calculated by RT-PCR.

<sup>5</sup>*Gel*: the PCR gel image.

<sup>6</sup>*UBP1* is a test of age-related intron retention.

**Table S7. Rhesus macaque sample and sequence read coverage information.**

| Brain Bank ID | Age   |      | Sex | RIN <sup>1</sup> | Source            | Total number of reads | Number of mapped reads |
|---------------|-------|------|-----|------------------|-------------------|-----------------------|------------------------|
|               | Years | Days |     |                  |                   |                       |                        |
| NB0902        | 0     | 1    | m   | 8.9              | SEAC <sup>2</sup> | 35,647,306            | 25,827,729             |
| NB0901        | 0     | 1    | m   | 8.3              | SEAC              | 36,207,576            | 24,083,109             |
| NB0905        | 0     | 7    | m   | 8.7              | SEAC              | 35,368,530            | 23,638,865             |
| 0705          | 0     | 16   | m   | 9.1              | SEAC              | 33,944,540            | 23,157,558             |
| 0703          | 0     | 22   | m   | 9.9              | SEAC              | 35,150,179            | 22,902,814             |
| 070141        | 0     | 153  | m   | 9.3              | SEAC              | 36,074,539            | 23,601,772             |
| 070133        | 0     | 207  | m   | 9.1              | SEAC              | 34,525,819            | 23,390,434             |
| 06711         | 0     | 310  | m   | 9.8              | SEAC              | 31,005,239            | 19,386,532             |
| 051095        | 2     | 9    | m   | 9.5              | SEAC              | 32,143,377            | 18,674,467             |
| 03071         | 4     | 27   | m   | 9.7              | SEAC              | 30,998,685            | 18,332,895             |
| 98073         | 9     | 104  | m   | 9                | SEAC              | 32,106,698            | 19,123,960             |
| 92107         | 15    | 3    | m   | 9.5              | SEAC              | 31,450,483            | 19,056,475             |
| 85091         | 22    | 74   | m   | 9.2              | SEAC              | 28,942,443            | 17,622,622             |
| 198100        | 26    | 28   | m   | 8.6              | SEAC              | 29,315,091            | 17,111,572             |
| QDL II        | 28    | 0    | f   | 7.8              | SEAC              | 29,042,277            | 16,679,686             |

<sup>1</sup>RIN: RNA integrity values measured by Agilent Bioanalyzer.

<sup>2</sup>SEAC: Suzhou Experimental Animal Center, Suzhou, China.

**Table S8. Functional characteristics of genes in different splicing patterns.**

| Splicing Pattern |                | Function annotation                           | Observed <sup>1</sup> | All <sup>2</sup>       | <i>p</i> -value <sup>3</sup> | Adjust <i>p</i> -value <sup>4</sup> |
|------------------|----------------|-----------------------------------------------|-----------------------|------------------------|------------------------------|-------------------------------------|
| CL6              | GO             | nervous system development                    | 16                    | 64                     | 3.98E-03                     | 8.05E-02                            |
|                  |                | mating                                        | 3                     | 0                      | 1.06E-03                     | 6.44E-02                            |
|                  |                | synaptogenesis                                | 4                     | 4                      | 5.32E-03                     | 8.80E-02                            |
|                  |                | neuromuscular process                         | 4                     | 4                      | 5.32E-03                     | 8.80E-02                            |
|                  |                | suckling behavior                             | 3                     | 0                      | 1.06E-03                     | 6.44E-02                            |
|                  |                | mating behavior                               | 3                     | 0                      | 1.06E-03                     | 6.44E-02                            |
|                  |                | behavior                                      | 7                     | 13                     | 2.39E-03                     | 8.05E-02                            |
|                  |                | learning                                      | 3                     | 1                      | 3.93E-03                     | 8.05E-02                            |
|                  |                | actin filament-based movement                 | 3                     | 1                      | 3.93E-03                     | 8.05E-02                            |
|                  |                | feeding behavior                              | 3                     | 1                      | 3.93E-03                     | 8.05E-02                            |
|                  |                | anatomical structure development              | 23                    | 107                    | 2.51E-03                     | 8.05E-02                            |
| CL7              | KEGG           | Endocytosis                                   | 3                     | 14                     | 5.26E-02                     | 5.26E-02                            |
|                  |                | Oocyte meiosis                                | 3                     | 5                      | 5.78E-03                     | 1.16E-02                            |
| CL8              | GO             | cell adhesion                                 | 5                     | 43                     | 1.66E-02                     | 6.08E-02                            |
|                  |                | actin cytoskeleton organization               | 5                     | 38                     | 1.04E-02                     | 4.94E-02                            |
|                  |                | cytoskeleton organization                     | 6                     | 55                     | 1.08E-02                     | 4.94E-02                            |
|                  |                | interspecies interaction between organisms    | 4                     | 15                     | 2.55E-03                     | 2.63E-02                            |
|                  |                | cell death                                    | 6                     | 45                     | 4.35E-03                     | 2.87E-02                            |
|                  |                | apoptosis                                     | 6                     | 34                     | 1.17E-03                     | 2.12E-02                            |
|                  |                | anti-apoptosis                                | 3                     | 5                      | 1.61E-03                     | 2.12E-02                            |
|                  |                | negative regulation of apoptosis              | 4                     | 11                     | 9.80E-04                     | 2.12E-02                            |
|                  |                | death                                         | 6                     | 45                     | 4.35E-03                     | 2.87E-02                            |
|                  |                | regulation of apoptosis                       | 5                     | 28                     | 3.19E-03                     | 2.63E-02                            |
|                  |                | regulation of synaptic transmission           | 3                     | 12                     | 1.12E-02                     | 4.94E-02                            |
|                  |                | negative regulation of programmed cell death  | 4                     | 11                     | 9.80E-04                     | 2.12E-02                            |
|                  |                | regulation of programmed cell death           | 5                     | 28                     | 3.19E-03                     | 2.63E-02                            |
|                  |                | regulation of cellular component organization | 5                     | 47                     | 2.31E-02                     | 8.01E-02                            |
|                  |                | regulation of neurogenesis                    | 3                     | 10                     | 7.37E-03                     | 4.05E-02                            |
|                  |                | actin filament-based process                  | 5                     | 40                     | 1.26E-02                     | 5.21E-02                            |
|                  |                | programmed cell death                         | 6                     | 35                     | 1.34E-03                     | 2.12E-02                            |
|                  |                | negative regulation of cellular process       | 7                     | 68                     | 7.36E-03                     | 4.05E-02                            |
|                  |                | biological adhesion                           | 5                     | 43                     | 1.66E-02                     | 6.08E-02                            |
|                  |                |                                               | KEGG                  | MAPK signaling pathway | 3                            | 17                                  |
|                  | Focal adhesion | 3                                             |                       | 11                     | 7.24E-03                     | 1.45E-02                            |

<sup>1</sup>*Observed*: number of genes that overlap between specific gene set and genes for segments within cluster.

<sup>2</sup>*All*: number of genes that overlap between specific gene set and genes for all age-related segments.

<sup>3</sup>*p-value*: hypergeometric test p-value.

<sup>4</sup>*Adjust p-value*: hypergeometric test p-value after Benjamini-Hochberg correction for multiple testing.

**Table S9. List of correlated splicing factors.**

| Splicing Pattern | Positive correlated |                 | Negative correlated |                 |
|------------------|---------------------|-----------------|---------------------|-----------------|
|                  | Ensemble ID         | HGNC ID         | Ensemble ID         | HGNC ID         |
| CL1              | ENSG00000117569     | <i>PTBP2</i>    | ENSG00000100650     | <i>SRp40</i>    |
|                  | ENSG00000011304     | <i>PTBP1</i>    | ENSG00000126945     | <i>hnRNPH2</i>  |
|                  | ENSG00000161547     | <i>SC35</i>     |                     |                 |
|                  | ENSG00000136527     | <i>Tra2beta</i> |                     |                 |
|                  | ENSG00000135486     | <i>hnRNPA1</i>  |                     |                 |
|                  | ENSG00000096746     | <i>hnRNPH3</i>  |                     |                 |
|                  | ENSG00000169813     | <i>hnRNPHF</i>  |                     |                 |
|                  | ENSG00000169045     | <i>hnRNPH1</i>  |                     |                 |
| CL2              |                     |                 | ENSG00000161547     | <i>SC35</i>     |
| CL3              | ENSG00000117569     | <i>PTBP2</i>    |                     |                 |
|                  | ENSG00000048740     | <i>ETR3</i>     |                     |                 |
| CL4              |                     |                 | ENSG00000152601     | <i>MBNL1</i>    |
| CL5              |                     |                 | ENSG00000136527     | <i>Tra2beta</i> |
| CL6              | ENSG00000126945     | <i>hnRNPH2</i>  | ENSG00000112081     | <i>SRp20</i>    |
|                  |                     |                 | ENSG00000096746     | <i>hnRNPH3</i>  |
|                  |                     |                 | ENSG00000169813     | <i>hnRNPHF</i>  |
|                  |                     |                 | ENSG00000169045     | <i>hnRNPH1</i>  |
| CL7              | ENSG00000161547     | <i>SC35</i>     |                     |                 |
|                  | ENSG00000100650     | <i>SRp40</i>    |                     |                 |
| CL8              |                     |                 | ENSG00000112531     | <i>QKI</i>      |
|                  |                     |                 | ENSG00000117569     | <i>PTBP2</i>    |
|                  |                     |                 | ENSG00000011304     | <i>PTBP1</i>    |

**Table S10. Enrichment of genes with cell-type specific expression in splicing patterns (top) or brain region-specific genes (bottom).**

|                                                   | Neurons | OPCs  | OLs   | Astrocytes | White matter | Gray matter |
|---------------------------------------------------|---------|-------|-------|------------|--------------|-------------|
| <b>Splicing patterns</b>                          |         |       |       |            |              |             |
| c1                                                | 1.04    | 1.19  | 0.91  | 0.88       | 1.08         | 0.79        |
| c2                                                | 1.08    | 0.70  | 1.01  | 0.92       | 1.05         | 0.87        |
| c3                                                | 1.15    | 0.81  | 0.82  | 0.91       | 0.95         | 1.15        |
| c4                                                | 0.94    | 0.29  | 1.23  | 1.29       | 0.98         | 1.05        |
| c5                                                | 1.06    | 2.74  | 0.59  | 0.39       | 0.60         | 2.13        |
| c6                                                | 0.66    | 0.00  | 1.66  | 1.69       | 0.74         | 1.74        |
| c7                                                | 1.13    | 1.47  | 0.63  | 0.83       | 1.01         | 0.96        |
| c8                                                | 0.57    | 0.00  | 2.53  | 0.83       | 0.75         | 1.70        |
| <b>Gene with brain region-specific expression</b> |         |       |       |            |              |             |
| PFC-specific                                      | 1.16    | 0.76  | 0.98  | 0.96       | 1.02         | 0.95        |
| CBC-specific                                      | 0.80    | 1.31  | 1.03  | 1.05       | 0.95         | 1.11        |
| <i>p</i> -value                                   | ≥0.1    | ≥0.05 | ≥0.01 | <0.01      |              |             |

Numbers are odd ratios (observed to expected), *p*-values from Fisher's exact test are shown in different colors: ≥0.1 – white; 0.05-0.1 – light gray; 0.0-0.05 – gray; <0.01 – dark gray.



**Table S12. PCR primers.**

| <b>Gene and relative segment location<sup>1</sup> (bp)</b> | <b>Up-stream primer sequence (5'-3')</b> | <b>Down-stream primer sequence (5'-3')</b> | <b>Product lengths (bp) (long/short)</b> |
|------------------------------------------------------------|------------------------------------------|--------------------------------------------|------------------------------------------|
| AGAP3 34157-37048                                          | TCAGCGACTACTCGTCCTCAG                    | AGTTGGAAACAGTGGCACAT                       | 380/154                                  |
| AKR1B1 11261-11987                                         | GCAGCCAAGCACAATAAAACT                    | ATCACCACCAAGTTCCTCTG                       | 699/71                                   |
| ASPH 181884-181928                                         | AAGAATGGGAGGAAAGGC                       | ACTTTGGCATCATCCACATC                       | 236/191                                  |
| CADPS 83378-83510                                          | ATGTGGATCTGATGGAGTCC                     | GTCCCGAATGAAGGTCTG                         | 290/143                                  |
| CDC42BPA 21014-21199                                       | GCTACGAGATCCAGAAATG                      | GGAATACTGACTGAGCCACT                       | 351/165                                  |
| CTNNA2 1433854-1433997                                     | AAGGTGAAGGCAGAAGTG                       | CTGGTATTTGGTTGAGGC                         | 294/150                                  |
| DBN1 2996-3133                                             | TGACAACCCAAGGGAGTTCT                     | GCTCTATCTGCTCAGCGACAG                      | 334/196                                  |
| DCLK1 19228-19301                                          | CAAGCCGAATAGCACAGC                       | TTCCGATTCCGAGTTGAG                         | 225/151                                  |
| EXD3 56722-66995                                           | GCTTTGACATCAAGGACG                       | CTCCTGCAGACGCAAGAC                         | 1125/107                                 |
| FMNL2 305555-313054                                        | CAAAGAGGCAGCAGCAAG                       | TGGGCAGTTTCATTACG                          | 396/270                                  |
| GRIN1 9763-9825                                            | CCTACTCCCACCAGTCCAG                      | TCTTTCGCCTCCATCAGC                         | 274/211                                  |
| LMO7 234827-234935                                         | TTGGAGACAGCCTCCTTG                       | TGCAGTACAGTTGGTGGTTT                       | 443/334                                  |
| MAPRE3 53642-53686                                         | GACGCAAATATGATGGAAAG                     | TGGGCATCAGTCTCATGG                         | 257/212                                  |
| MAPT 115927-116019                                         | AGAAGGTGGCAGTGGTCC                       | ATGGATGTTGCCTAATGAGC                       | 320/227                                  |
| MAPT 77476-77535                                           | AAGAGGGTGACACGGACGCT                     | TTGCTGGAATCCTGGTGGC                        | 330/243                                  |
| MATR3 51545-51688                                          | TTAGGTGATGTGGCTTCT                       | AAGTTCCTCGATCTTGTC                         | 264/120                                  |
| NDRG2 6102-6143                                            | GGTGCAGATCACAGAGGAG                      | ACATCGTGGTAGGTAAGGAT                       | 195/153                                  |
| NEO1 240857-241015                                         | GTCTACACTGGCTGGAAG                       | ATGTTTGAGACGAAGAGG                         | 288/129                                  |
| NRCAM 78008-78064                                          | ATACTCAAACCATACAGCAG                     | CTCCAGTGAAAGCACATT                         | 203/146                                  |
| PALM 31400-31531                                           | ACAAGCGAGTCTCCAACAC                      | GCTTTGTGGATGAGTTCG                         | 274/142                                  |
| R3HDM1 73402-90154                                         | CAATGAAGGATTTGGAGG                       | ACTTATCACTGGCCTTTTC                        | 351/219                                  |
| SGIP1 148487-148911                                        | GCTACCCCAACCCGAAC                        | TGCAAGCAACCAAAGGAG                         | 589/88                                   |
| UBP1 47918-48809                                           | TAATCAGGTTTACAGACAG                      | TAAAAACAACCTCATCTT                         | 788/91                                   |
| WNK1 126651-127109                                         | CACTTTCACAGACATCAACCT                    | AGTGGTCGGCTGGGTAG                          | 917/179                                  |

<sup>1</sup>Relative segment location is counted from the 5' end of each gene.

## Supplementary figures

### a. Dataset 1

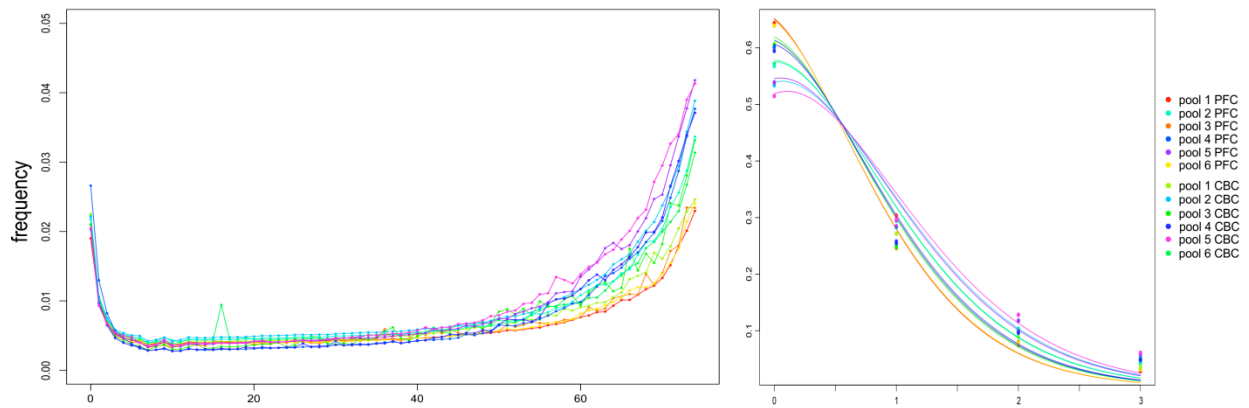

### b. Dataset 2

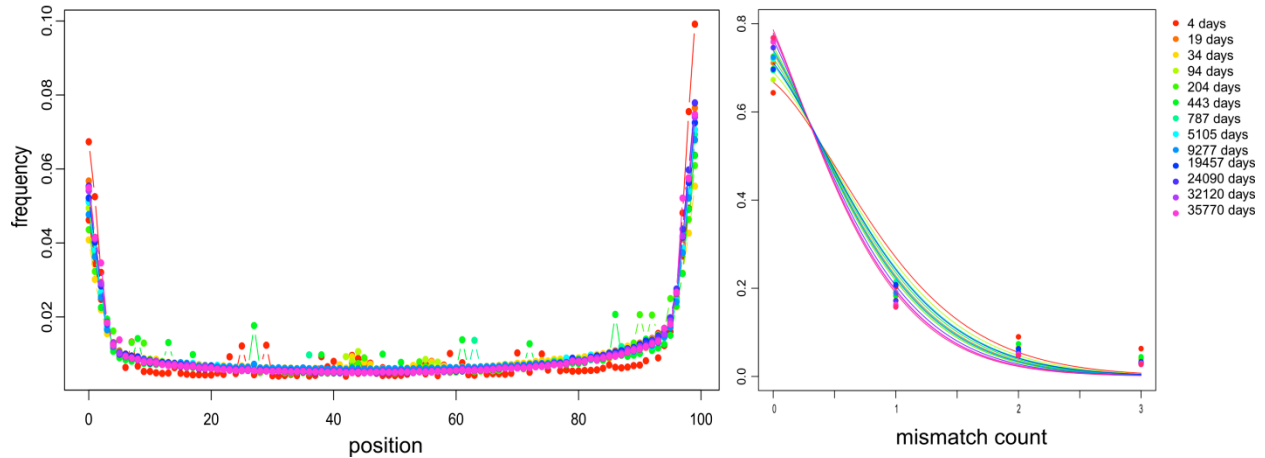

**Figure S1. The distribution and frequency of mismatches along reads.**

In the left panel, the x-axis shows the nt position within read (from 0 to 75 for DS1, or from 0 to 100 from DS2) and the y-axis shows the proportion of mismatches occurring at a given position. In the right panel, the x-axis shows the mismatch count (maximum of three mismatches were allowed by the mapping procedure), the y-axis shows frequency of reads with a given number of mismatches. The curves represent a fitted Poisson distribution.



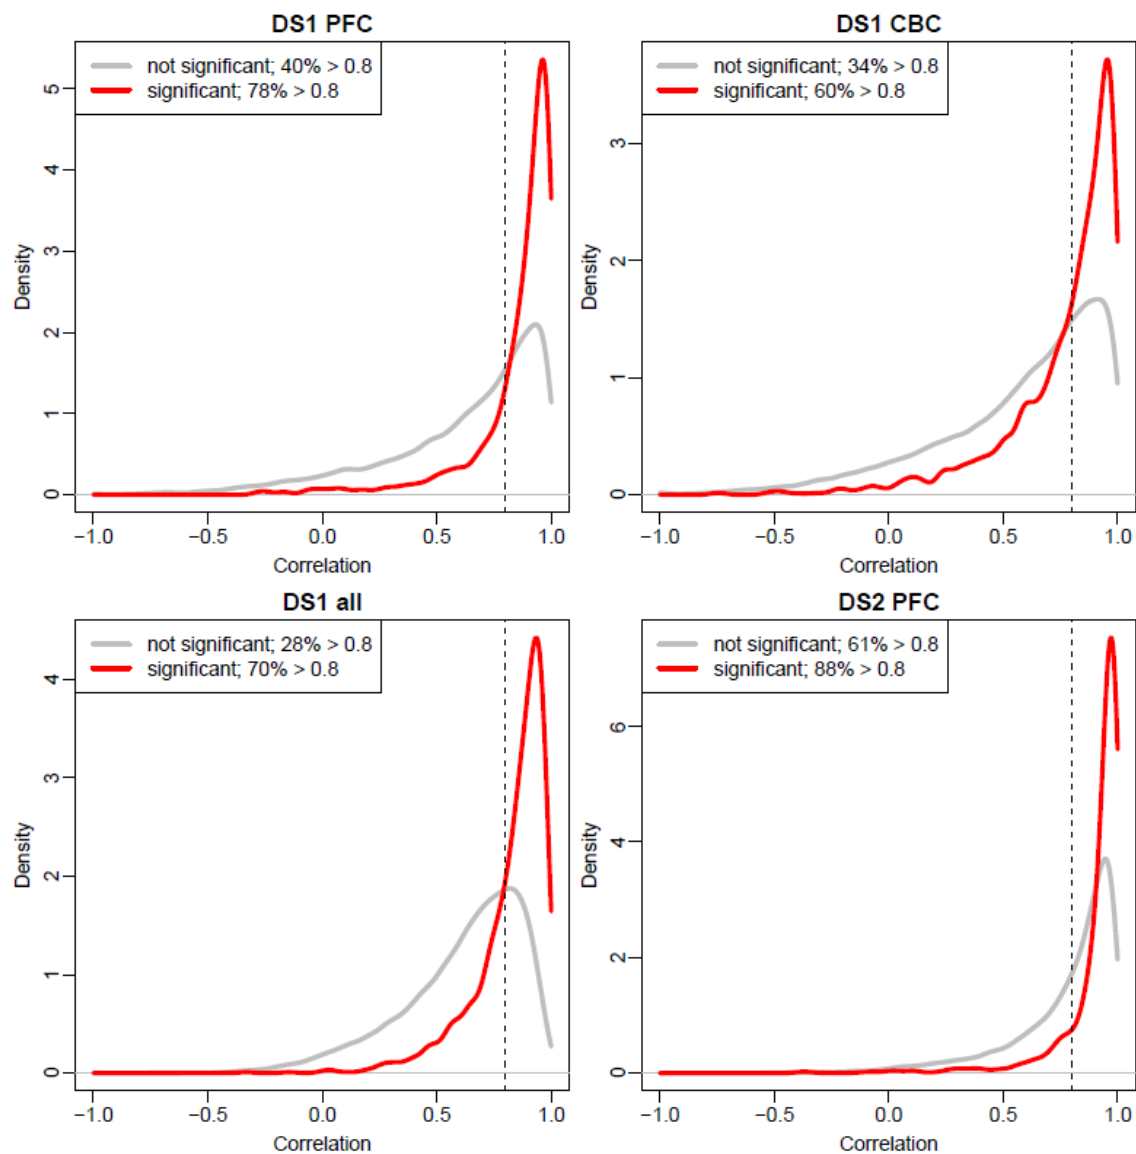

**Figure S2. Effect of allowing mismatches during read mapping on inclusion ratio changes with age.**

Shown are distributions of Pearson correlation coefficient between inclusion ratio changes with age calculated based on reads mapped allowing up to three mismatches and reads mapped allowing zero mismatch. Correlation coefficient distributions are plotted for 1,484 segments with significant age-related splicing changes with age (red) and 28,638 remaining segments with sufficient reads coverage (gray). The vertical dashed line indicates  $r=0.8$  cutoff. The percentage of segments with correlation coefficient greater than 0.8 is shown in the plot legend.

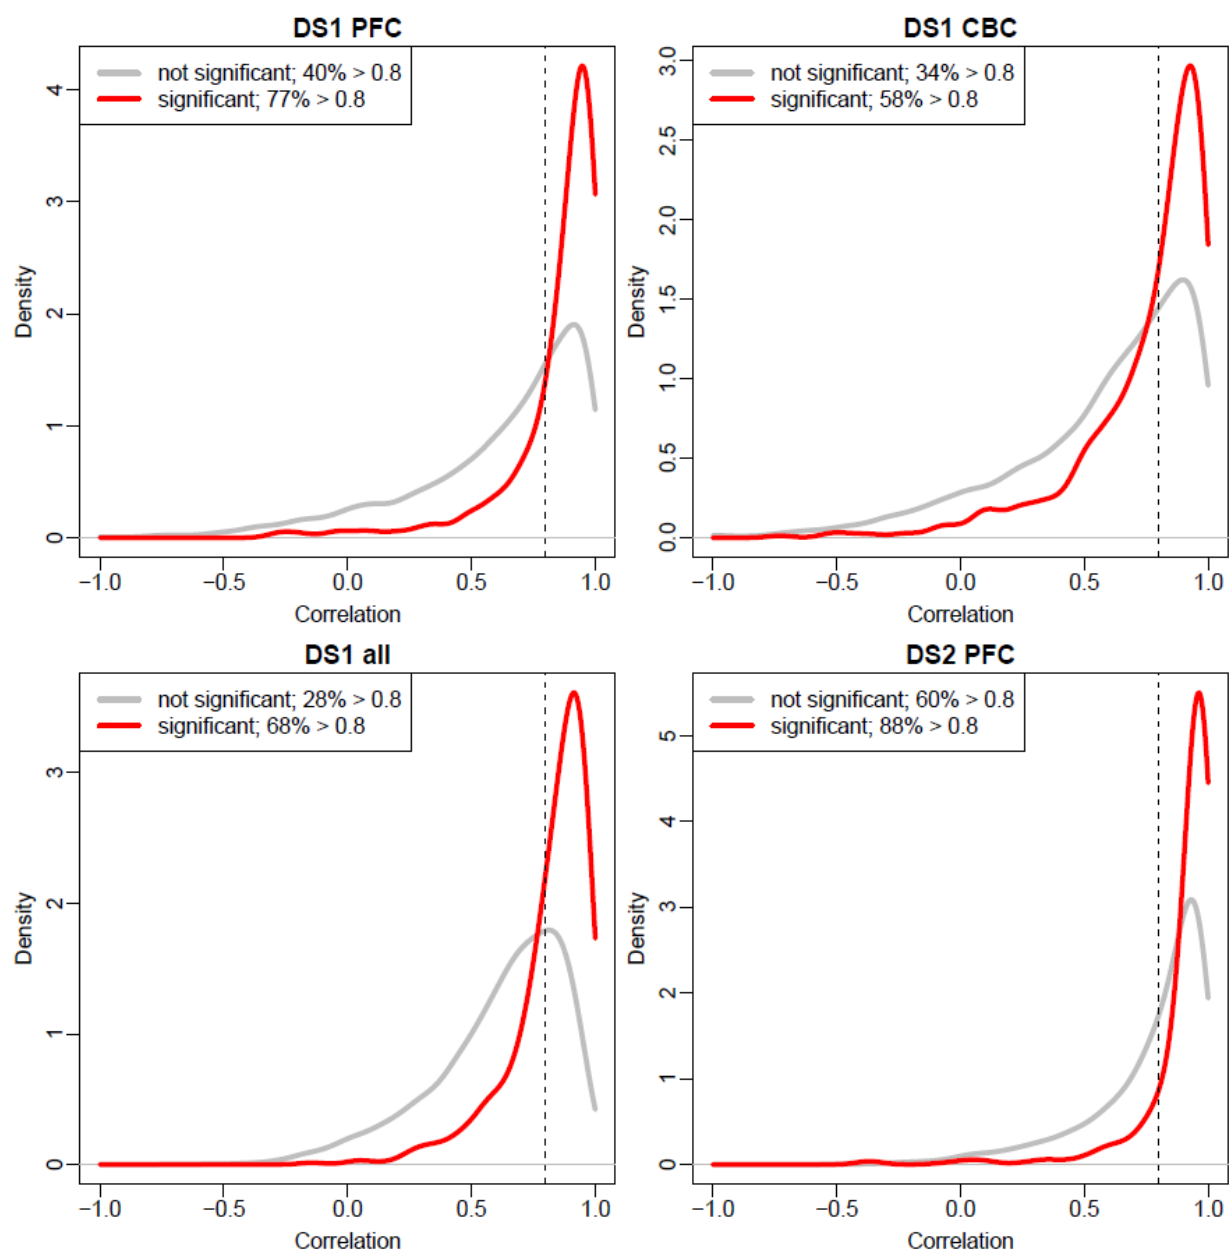

**Figure S3. Effect of allowing mismatches during read mapping on changes in intron retention with age.**

Shown are distributions of Pearson correlation coefficient between inclusion ratio changes with age calculated based on reads mapped allowing up to three mismatches and reads mapped allowing zero mismatch. Correlation coefficient distributions are plotted for 620 retained introns with significant age-related splicing changes with age (red) and 11,999 remaining retained introns with sufficient reads coverage (gray). The vertical dashed line indicates  $r=0.8$  cutoff. The percentage of retained introns with correlation coefficient greater than 0.8 is shown in each panel's legend.

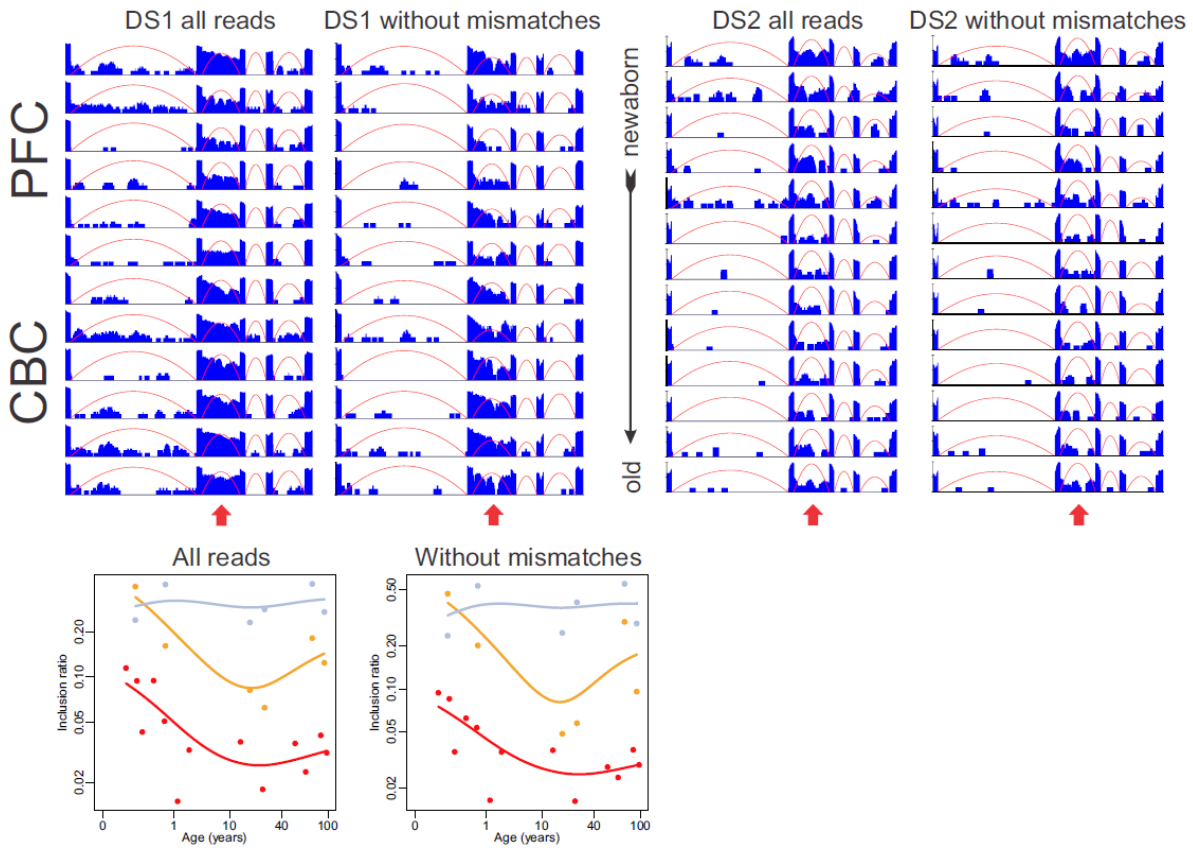

**Figure S4. Retention of the 7th intron of the *AKR1B1* gene.**

Top: RNA-seq coverage plots of the *AKR1B1* gene based on DS1 (left) and DS2 (right) data. The reads coverage is shown for all reads mapped with up to three mismatches allowed (all reads), and only for reads mapped with zero mismatches (without mismatches). Numbers of reads mapped to a genomic location are shown in blue, red arcs represents reads mapped to exon-exon junctions. RNA-seq coverage and inclusion ratio profiles are shown on log scale. The retained intron (the 7th intron of the gene) is indicated by the red arrow.

Bottom: inclusion ratio profiles of intron 7 of the *AKR1B1* gene. Each dot represents one sample, DS1 PFC, DS1 CBC and DS2 PFC are shown in orange, gray and red respectively, curves are cubic splines with three degrees of freedom.

### a. Dataset 1

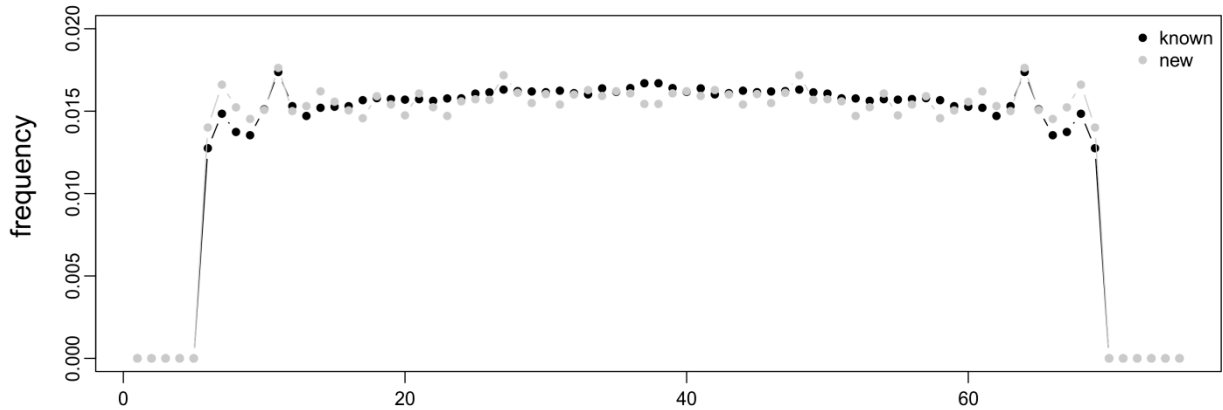

### b. Dataset 2

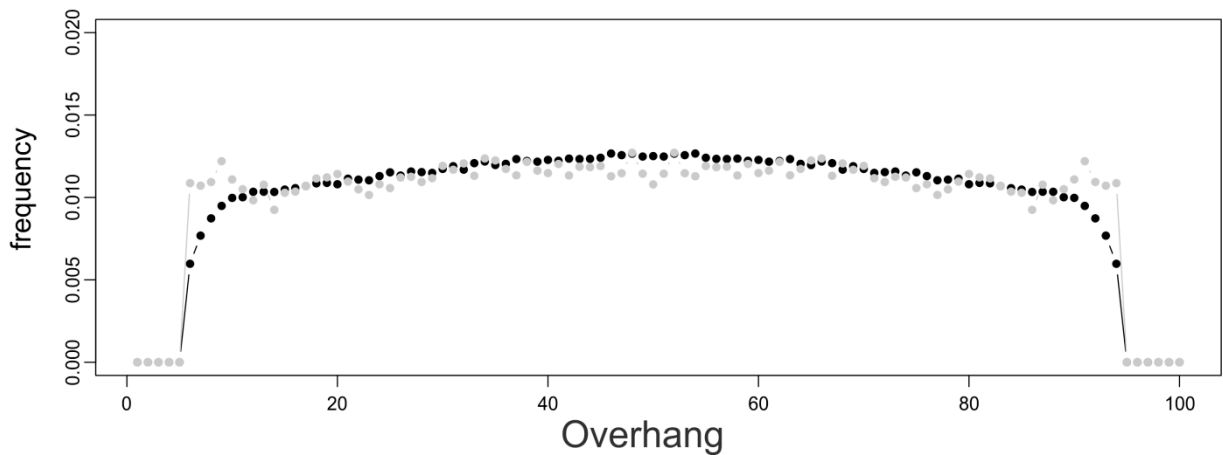

**Figure S5. The distribution of read overhangs lengths spanning splice junctions.**

Distribution of read overhangs (part of a read belonging to one exon) for reads mapped across splice junctions that consist of two exons and confirmed by at least two (DS1) or at least four (DS2) independent reads (reads with different mapping positions). Distribution of overhang length for reads spanning annotated junctions is shown in black, for reads spanning new junctions - in gray. Overhangs shorter than 6 nt were not considered. The x-axis shows the overhang length (nt).

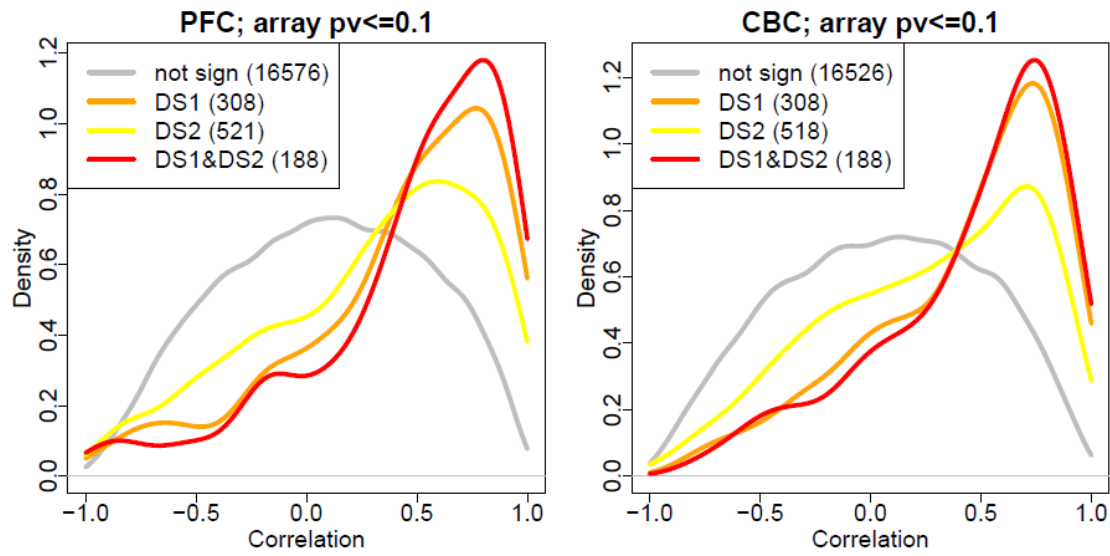

**Figure S6. Correlation between age-related inclusion ratio changes measured by Affymetrix Exon Arrays and RNA-seq.**

Shown are the correlations of the age-related inclusion ratio changes measured by RNA-seq (DS1) and Exon Arrays in CBC (right) and PFC (left) for segments with no significant age-related splicing change in the RNA-seq data (gray); segments significant only in the DS1 (orange); segments significant only in the DS2 (apricot), and segments significant in both datasets (red). Only segments showing significant age-related inclusion ratio trend (permutations,  $p < 0.1$ ) in the Exon Array dataset were used in analysis.

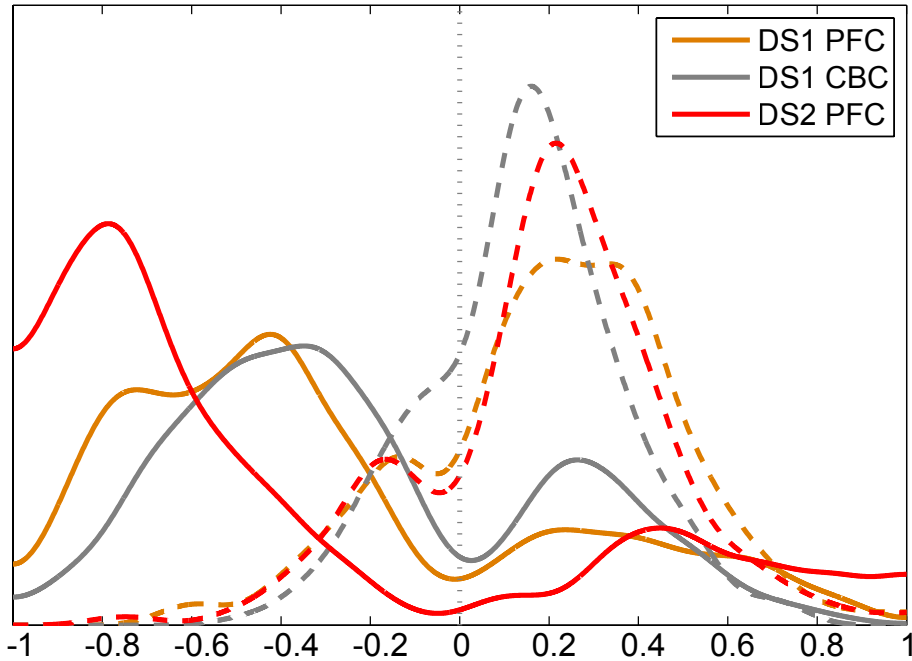

**Figure S7. Inclusion ratio change index distribution for gene segments showing significant inclusion ratio change in development and/or aging.**

Shown are developmental inclusion ratio change index distributions based on 970 segments showing significant splicing changes in development (solid lines) and aging inclusion ratio change index distributions based on 310 segments showing significant splicing changes in aging (dashed lines). Splicing changes in development and aging were identified using a linear model analysis based on five samples with ages between 2 days and 25 years for development, and five samples with ages between 25 years and 100 years for aging. All samples were selected from 13 individuals constituting DS2 (Supplementary Table S2). The 970 and 310 segments were identified among 1,484 segments with significant age-related splicing changes over the entire lifespan.

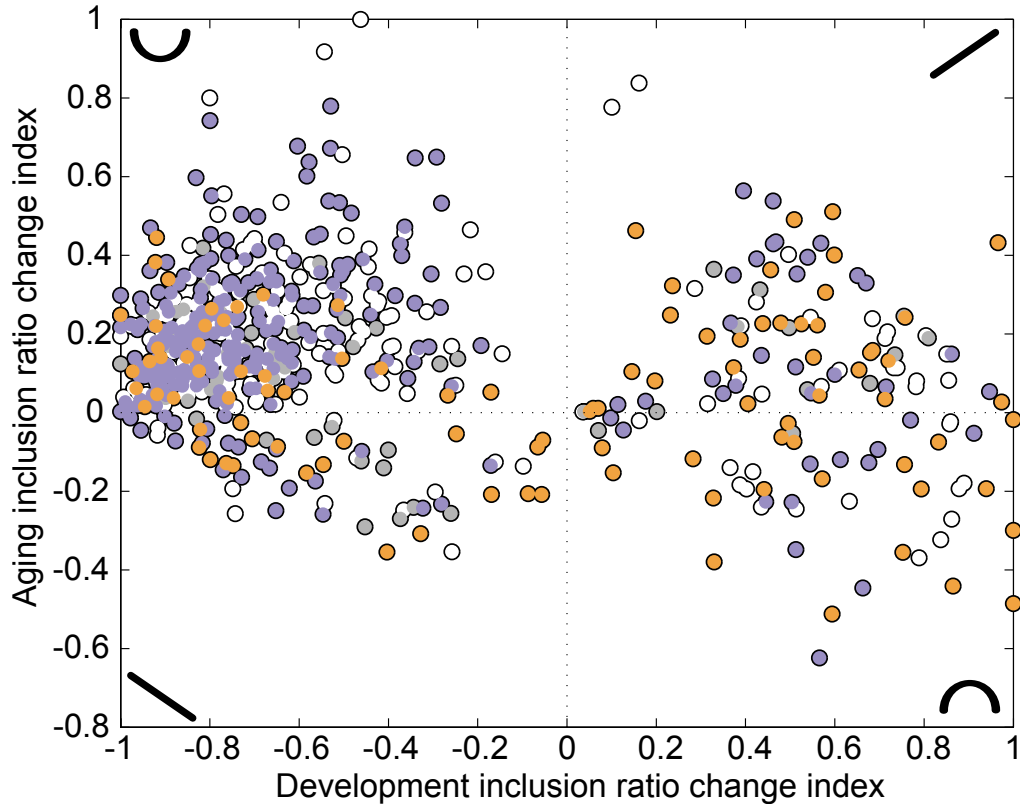

**Figure S8. Scatter plot of splicing change index distribution containing splicing type information.**

Shown are inclusion ratio change index distributions based on 659 segments showing significant splicing changes in development and/or aging among 1,484 segments with significant age-related splicing changes over the entire lifespan. As an additional criterion, segments were required to show consistent age-related change between DS1 and DS2 in both time intervals. The inclusion ratio change indexes shown were calculated based on DS2. The colors show different splicing types: violet – skipped exons, yellow – retained introns, gray and white – complex and mixed splice types. The four quadrants of the plot correspond to four patterns of inclusion ratio change with age: down-up, up-up, up-down and down-down as indicated by the black pattern diagrams shown in the four corners of the plot.

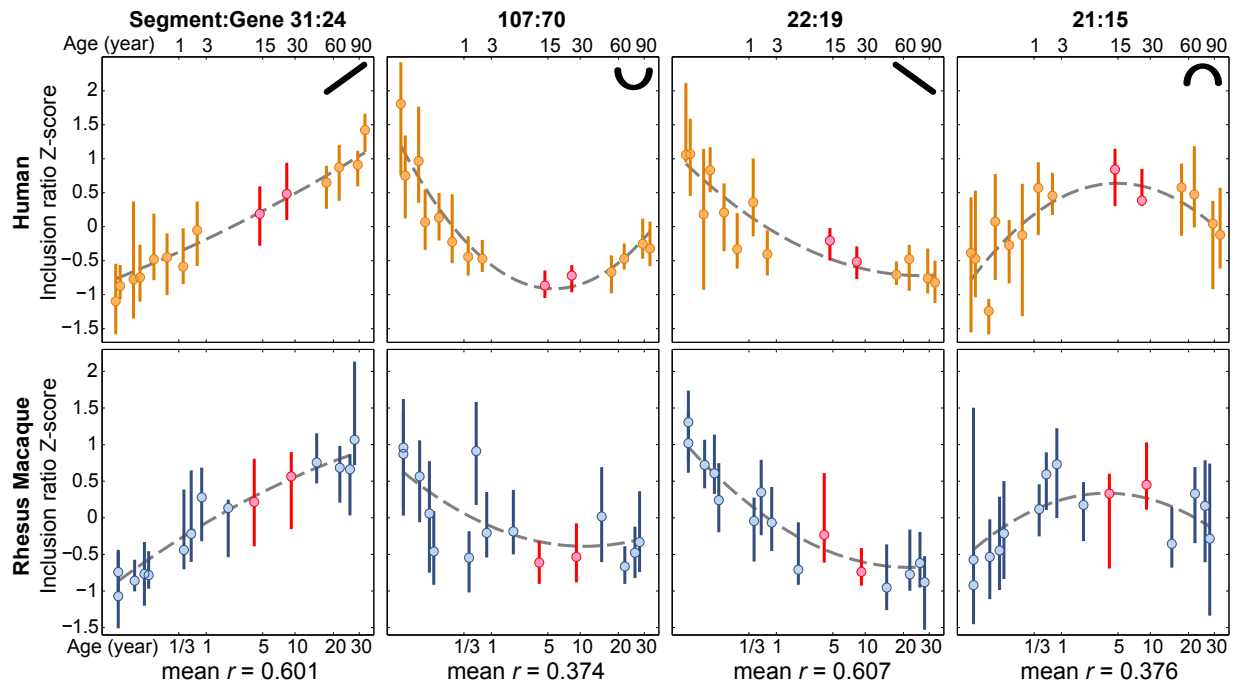

**Figure S9. For major age-related splicing change patterns in the human and macaque PFC.**

The panels show trajectories of splicing changes with age in the human (upper panels) and rhesus macaque (lower panels) PFC sorted according to the four major patterns depicted in the upper right corner of the upper panels. The changes are drawn for a total of 181 segments showing significant age-related changes in the human or macaque PFC and showing consistent splicing change direction in the two human datasets (DS1 and DS2). Correlations between the human and the macaque trajectories of splicing changes with age were robust with regard to segments selection criteria: All four main splicing patterns showed significantly greater positive correlations for 496 segments identified in humans that also mapped to macaques (mean  $r$  between 0.2 and 0.5; permutation test,  $p < 0.05$ ), as well as for the 290 segments identified in the human or the macaque time series (mean  $r$  between 0.4 and 0.6; permutation test,  $p < 0.005$ ). The segments were grouped into the four patterns based on their inclusion ratio changes with age in the human PFC. The inclusion ratios were normalized to mean=0 and standard deviation=1 before plotting. The vertical lines show 25% and 75% quartiles of the inclusion ratios across segments in a group, the cycles show the median. The mid-age samples used to separate development and aging phases are shown in red. The gray dashed line represents the quadric regression curve fitted to the median values. The numbers of segments and genes in each group are labeled on the top of the panel. The mean Pearson correlation coefficients of the segments'



inclusion ratios for each of the four patterns calculated between the human and the rhesus macaque time series are shown underneath the panels.

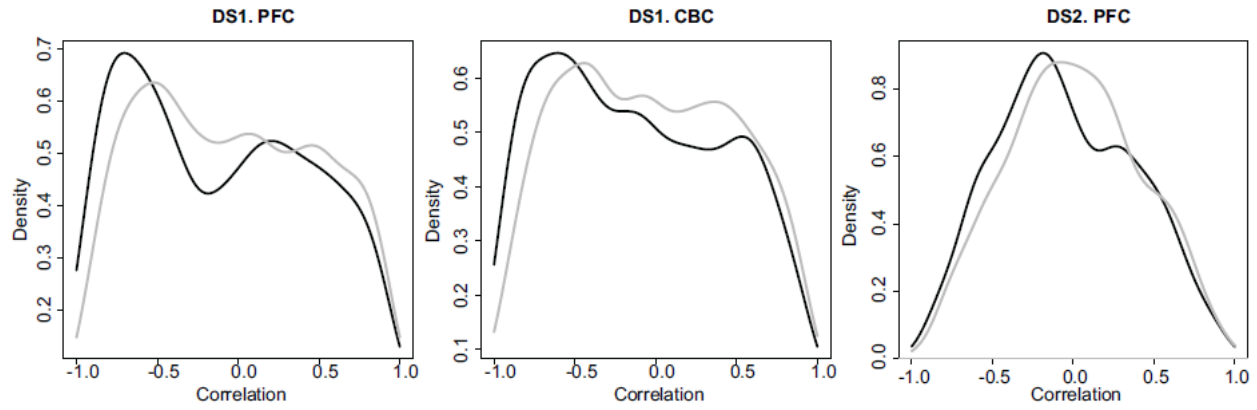

**Figure S10. Relationship between gene expression and segment inclusion ratio.**

Distribution of correlation coefficient between segment inclusion ratio and gene expression for segments with significant age-related splicing changes in both datasets and inclusion ratio defined in all samples ( $N = 1,422$ ) in DS1 PFC (left), DS1 CBC (middle) and DS2. Observed distribution is shown in black, background distribution (obtained by random assignment of segments to genes) is shown in gray.

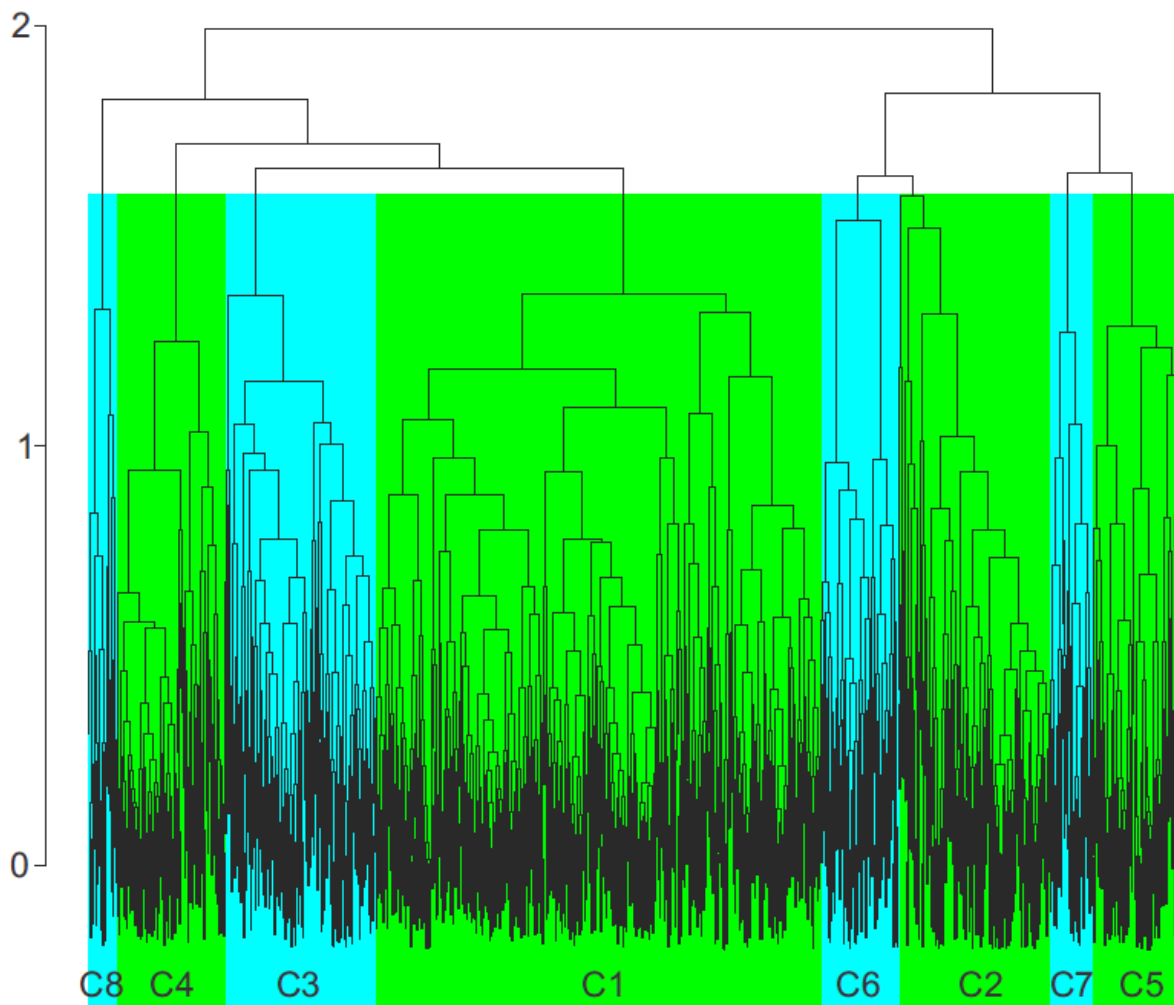

**Figure S11. Hierarchical clustering of inclusion ratio values reveals distinct splicing patterns.**

Hierarchical clustering dendrogram of segments with significant age-related splicing changes in both datasets and inclusion ratio defined in all samples ( $N = 1,422$ ). The clustering was done using the “complete” method. As distance measure, we used the pairwise negative Pearson correlation coefficient (specifically,  $1 - r$ ) between the inclusion ratio of segments from both brain regions. The colored areas indicate identified splicing patterns, numbered according to their size.

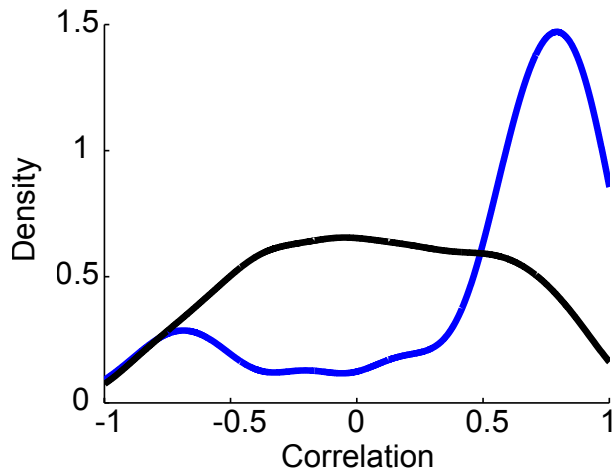

**Figure S12. Correlation of differences in age-related splicing changes between PFC and CBC measured using RNA-seq and Affymetrix Exon Arrays.**

Shown are the distributions of Pearson correlation coefficients based on a comparison of inclusion ratio differences between PFC and CBC measured using RNA-seq and Affymetrix Exon Arrays. This analysis is based on 601 segments showing significant age-related splicing changes in both RNA-Seq DS1 and Exon Array dataset. The blue line shows the distribution of Pearson correlation coefficients based on 71 out of 601 segments with significant differences in age-related splicing patterns between PFC and CBC in RNA-Seq. The black line shows the distributions of Pearson correlation coefficients based on the remaining 530 segments with no significant differences in age-related splicing patterns between PFC and CBC in RNA-Seq. An excess of positive correlations for segments showing significant splicing pattern differences between two brain regions is not expected, compared to the remaining segments (one-sided Wilcoxon test,  $p < 0.0001$ ), and indicates good agreement between RNA-seq and Affymetrix Exon Array platforms.

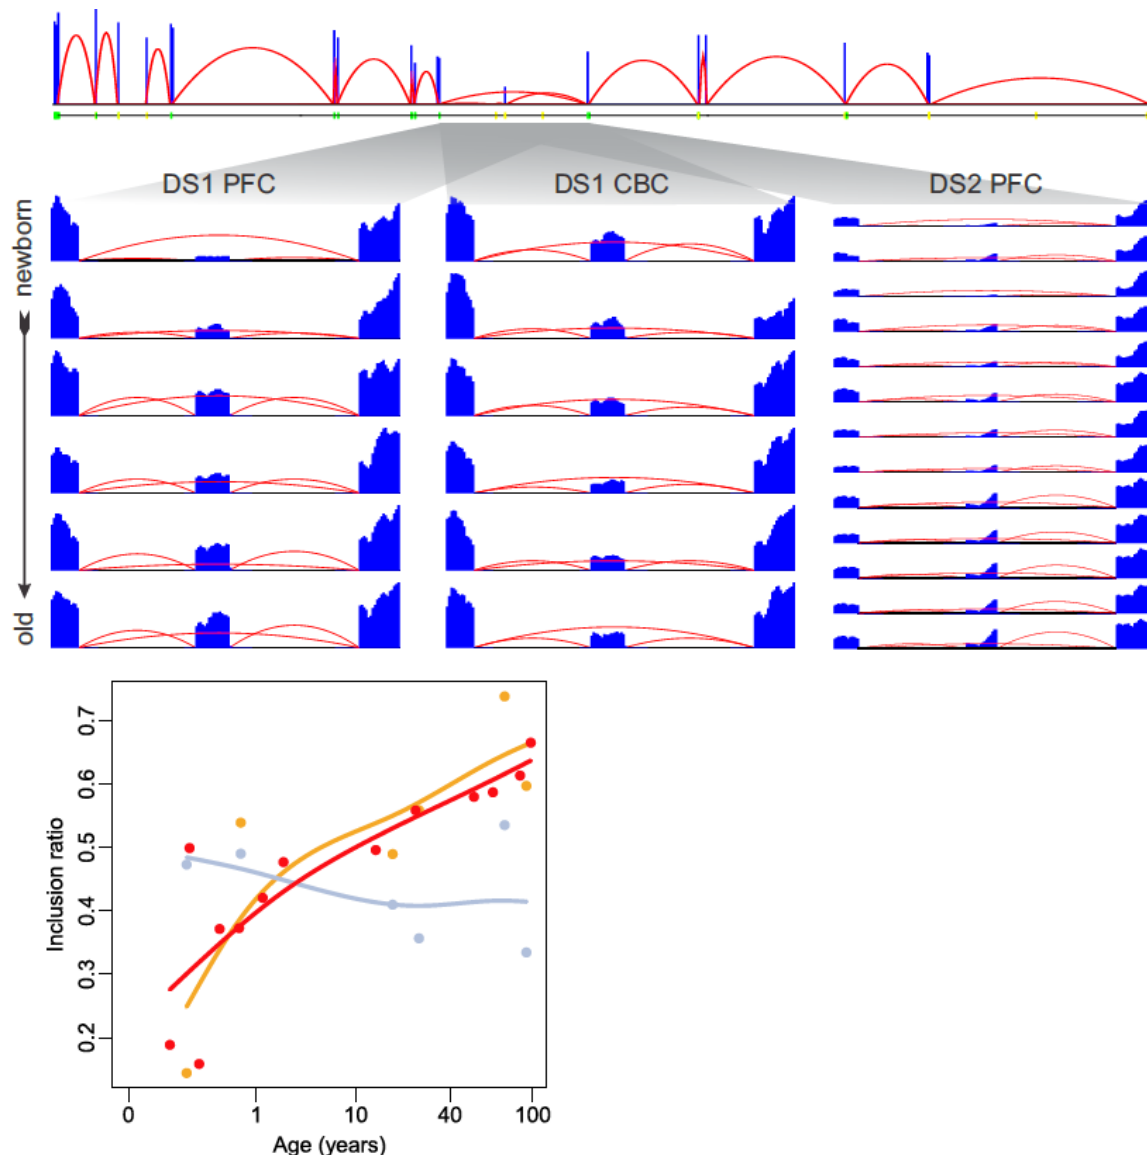

**Figure S13. Alternative splicing of *APP* exon 9.**

Top: RNA-seq coverage plots of the whole *APP* (amyloid beta (A4) precursor protein) gene based on all samples from DS1. A zoomed region of the 8th to 10th exons (not to scale) is also shown based on DS1 PFC (left), DS1 CBC (center) and DS2 (right) data. The reads coverage is shown for all reads mapped with up to three mismatches. Numbers of reads mapped to a genomic location are shown in blue, red arcs represents reads mapped to exon-exon junctions.

Bottom: inclusion ratio profiles of the 9th exon of the *APP* gene. Each dot represents one sample, DS1 PFC, DS1 CBC and DS2 PFC are shown in orange, gray and red respectively, curves are cubic splines with three degrees of freedom.

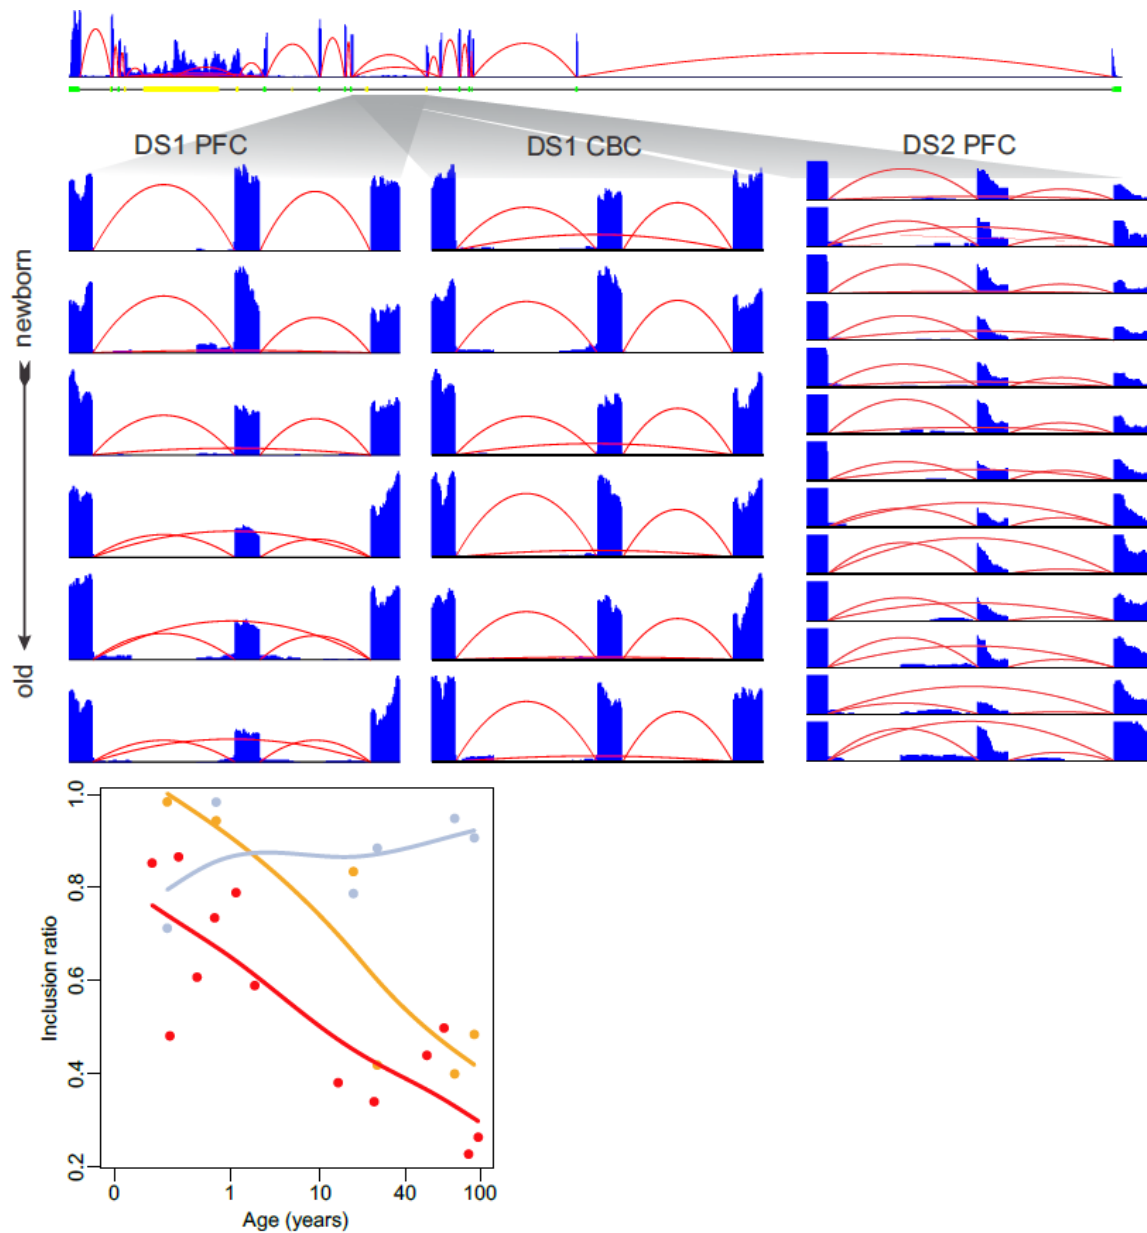

**Figure S14. Alternative splicing of the 6th exon of the *BIN1* gene.**

Top: RNA-seq coverage plots of the whole *BIN1* gene based on all samples from DS1. Zoomed region of 5th to 7th exons (not to scale) is also shown based on DS1 PFC (left), DS1 CBC (center) and DS2 (right) data. The reads coverage is shown for all reads mapped with up to three mismatches. Numbers of reads mapped to a genomic location are shown in blue, red arcs represents reads mapped to exon-exon junctions.

Bottom: inclusion ratio profiles of the 6th exon of the bridging integrator 1 (*BIN1*) gene. Each dot represents one sample, DS1 PFC, DS1 CBC and DS2 PFC are shown in orange, gray and red respectively, curves are cubic splines with three degrees of freedom.

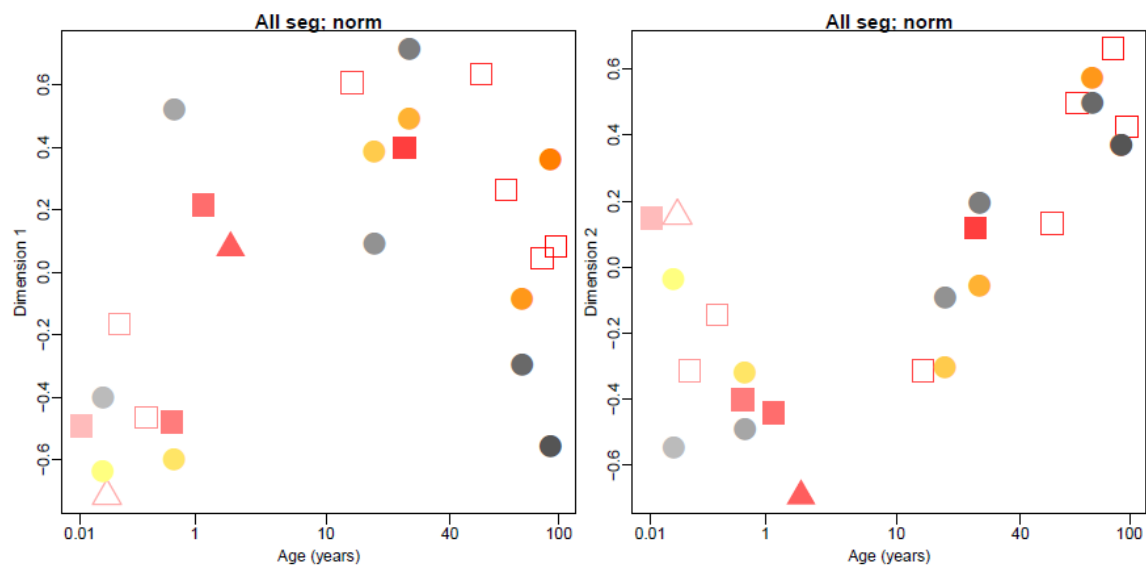

**Figure S15. Multi-dimensional scaling (MDS) analysis of splicing divergence.**

Shown are the results of Multi Dimensional Scaling (MDS) in two dimensions based on splicing the variation data from DS1 and DS2. Plots show the relationship between the first (left panel) and second (right panel) MDS dimensions and age. Each point represents one sample. DS1 samples are represented by circles (PFC - orange, CBC - gray). DS2 samples are represented by triangles (women) and squares (men); filled symbols represent African Americans, empty symbols - Caucasians. For both DS1 and DS2 darker colors correspond to older age. The analysis is based on 30,122 segments with sufficient sequence read coverage in both datasets.

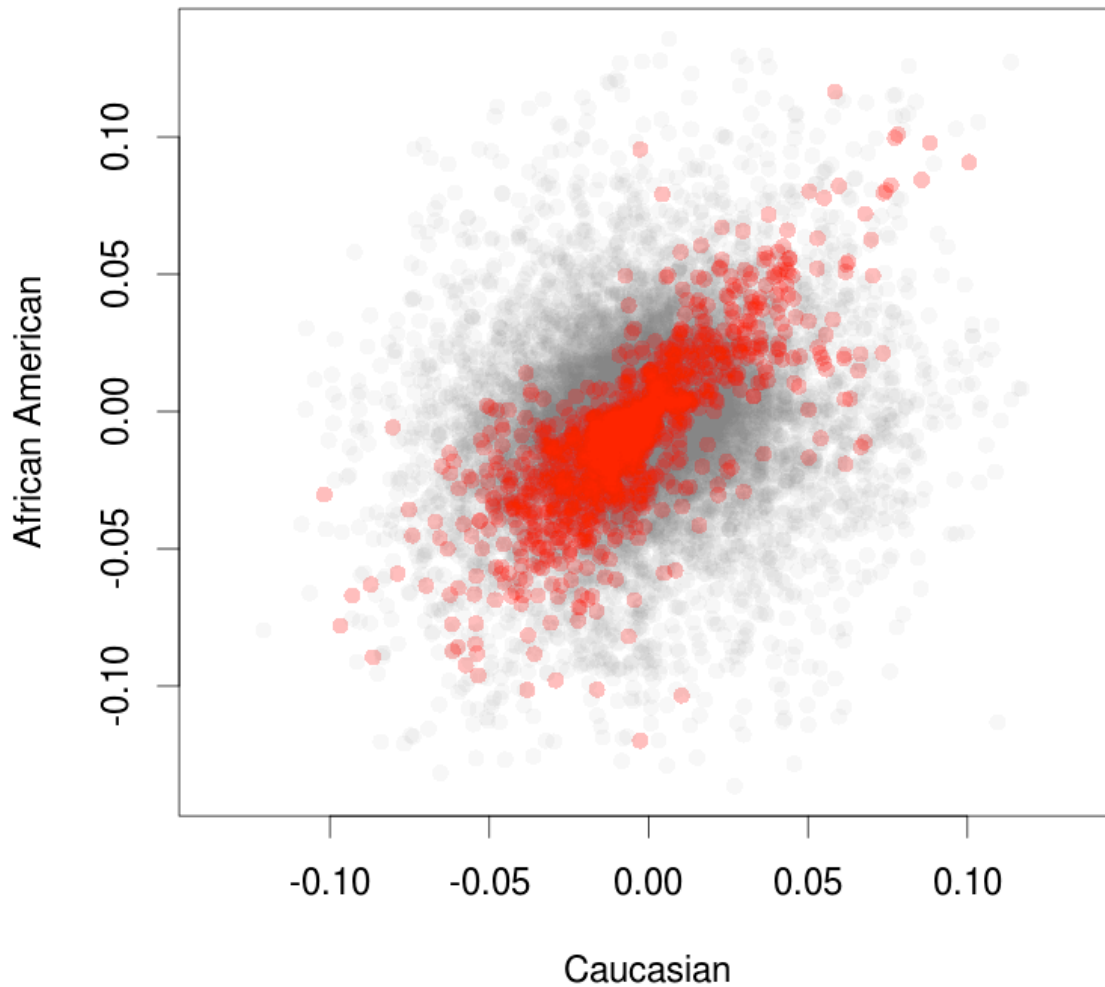

**Figure S16. Age-related splicing changes in African-Americans and Caucasians.**

Plotted are the rates of age-related splicing change in five African-American (Y-axis) and five Caucasian (X-axis) samples from DS2. Positive values represent inclusion ratio increase with age, negative values represent decrease. Each point represents a segment. Data for the 1463 segments with significant age-related splicing changes, and sufficient coverage in the 10 samples used in our analysis, are shown in red, 26670 segments that are not significant are shown in gray. Pearson correlation coefficient is 0.75 for segments with significant age-related splicing changes and 0.22 for non-significant segments.



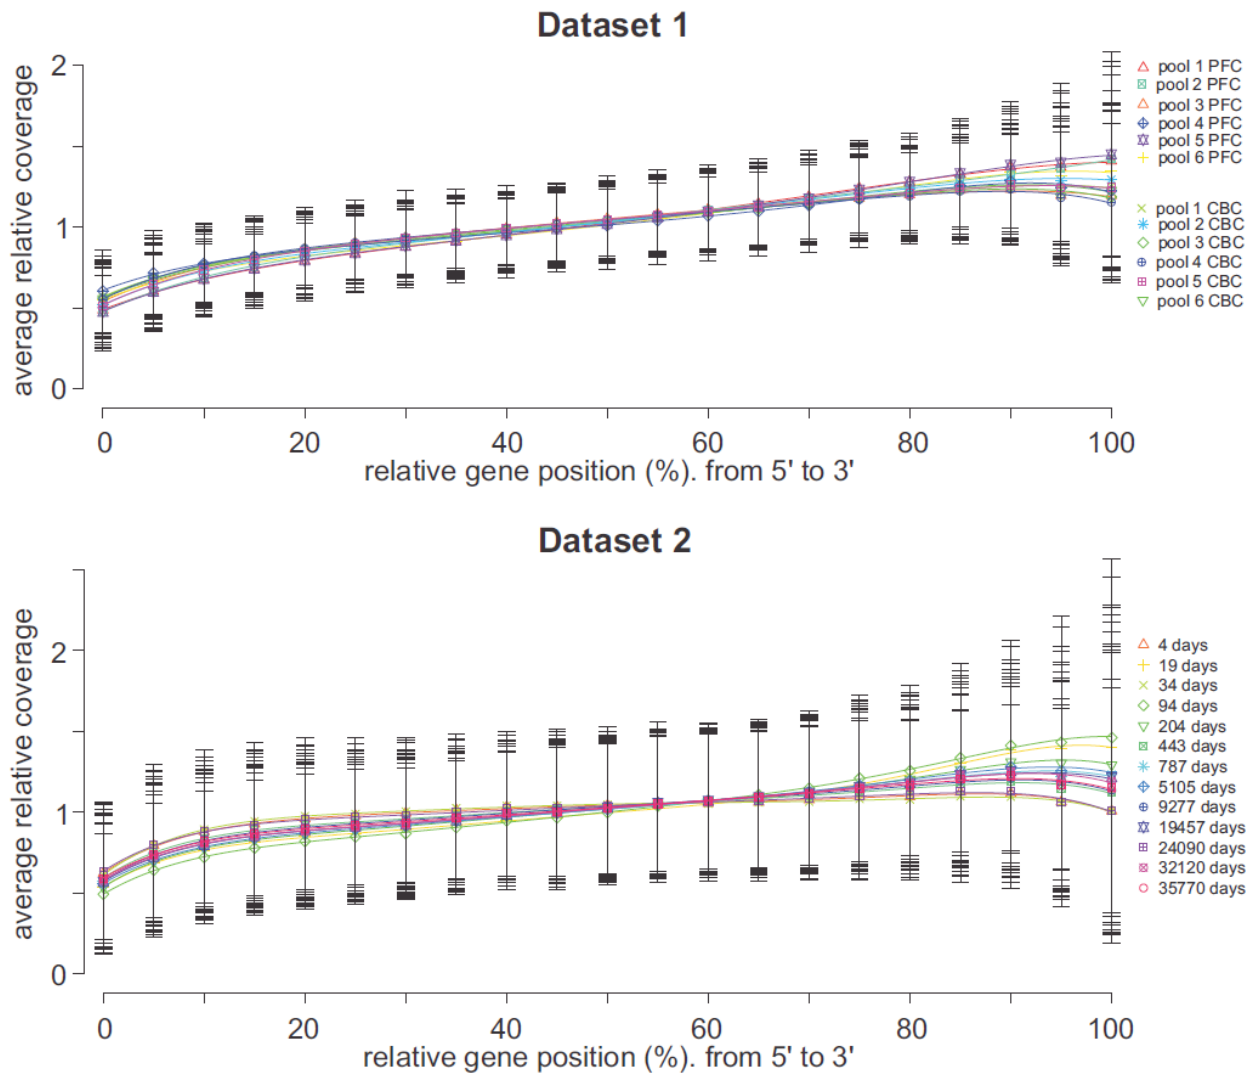

**Figure S17. Gene coverage bias.**

Shown are the average (among tested genes, 8,365 in DS1 and 8,061 in DS2) relative coverage of each nt binned into 21 bins along the gene. The relative coverage was defined as number of reads mapped to the nt divided by average number of read mapped to coding constitutive part of the gene. The x-axis represents relative position within transcript. Error bars represent  $\frac{1}{2}$  of the standard deviation.

## Supplementary references

1. Galarneau A, Richard S (2005) Target RNA motif and target mRNAs of the Quaking STAR protein. *Nature Structural & Molecular Biology* 12: 691-698.
2. Faustino NA, Cooper TA (2005) Identification of putative new splicing targets for ETR-3 using sequences identified by systematic evolution of ligands by exponential enrichment. *Molecular and Cellular Biology* 25: 879-887.
3. Bolognani F, Contente-Cuomo T, Perrone-Bizzozero NI (2010) Novel recognition motifs and biological functions of the RNA-binding protein HuD revealed by genome-wide identification of its targets. *Nucleic Acids Research* 38: 117-130.
4. Sanford JR, Wang X, Mort M, VanDuyn N, Cooper DN, et al. (2009) Splicing factor SFRS1 recognizes a functionally diverse landscape of RNA transcripts. *Genome Research* 19: 381-394.
